# Supplementary material for: Ion–ion interactions in β-NaGdF4:Yb3+,Er3+ nanocrystals – the effect of ion concentration and their clustering
Source: Royal Society of Chemistry journal article supplement (doi:10.1039/c5nr03385c), 2015-01-01
Supplement: c5nr03385c1.pdf [file c5nr03385c1.pdf]

## Supporting information

# Ion-ion interactions in $\beta$ -NaGdF<sub>4</sub>:Yb<sup>3+</sup>, Er<sup>3+</sup> nanocrystals – effect of ions concentration and their clustering

Agnieszka Noculak, Artur Podhorodecki\*, Grzegorz Pawlik, Mateusz Banski, Jan Misiewicz

Department of Experimental Physics, Wrocław University of Technology, Wyb. Wyspińskiego 27, 50-370 Wrocław, Poland

\*Corresponding author: e-mail: [artur.p.podhorodecki@pwr.edu.pl](mailto:artur.p.podhorodecki@pwr.edu.pl)

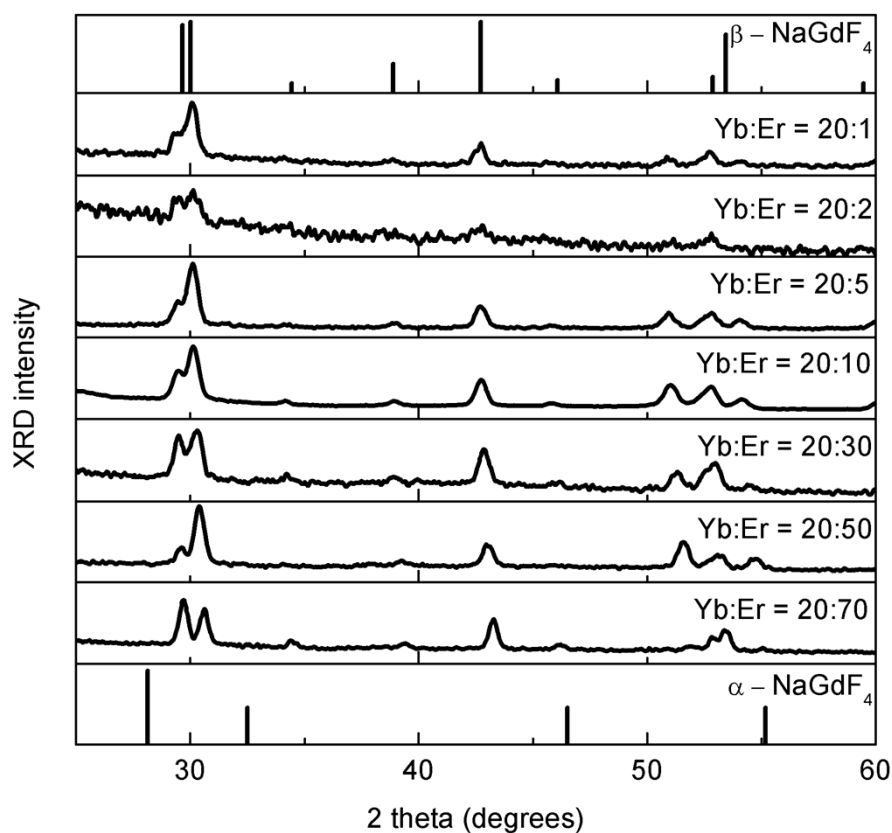

Figure 1S. XRD results of NaGdF<sub>4</sub>:Yb<sup>3+</sup>, Er<sup>3+</sup> RENCs with different Er<sup>3+</sup> ions concentration

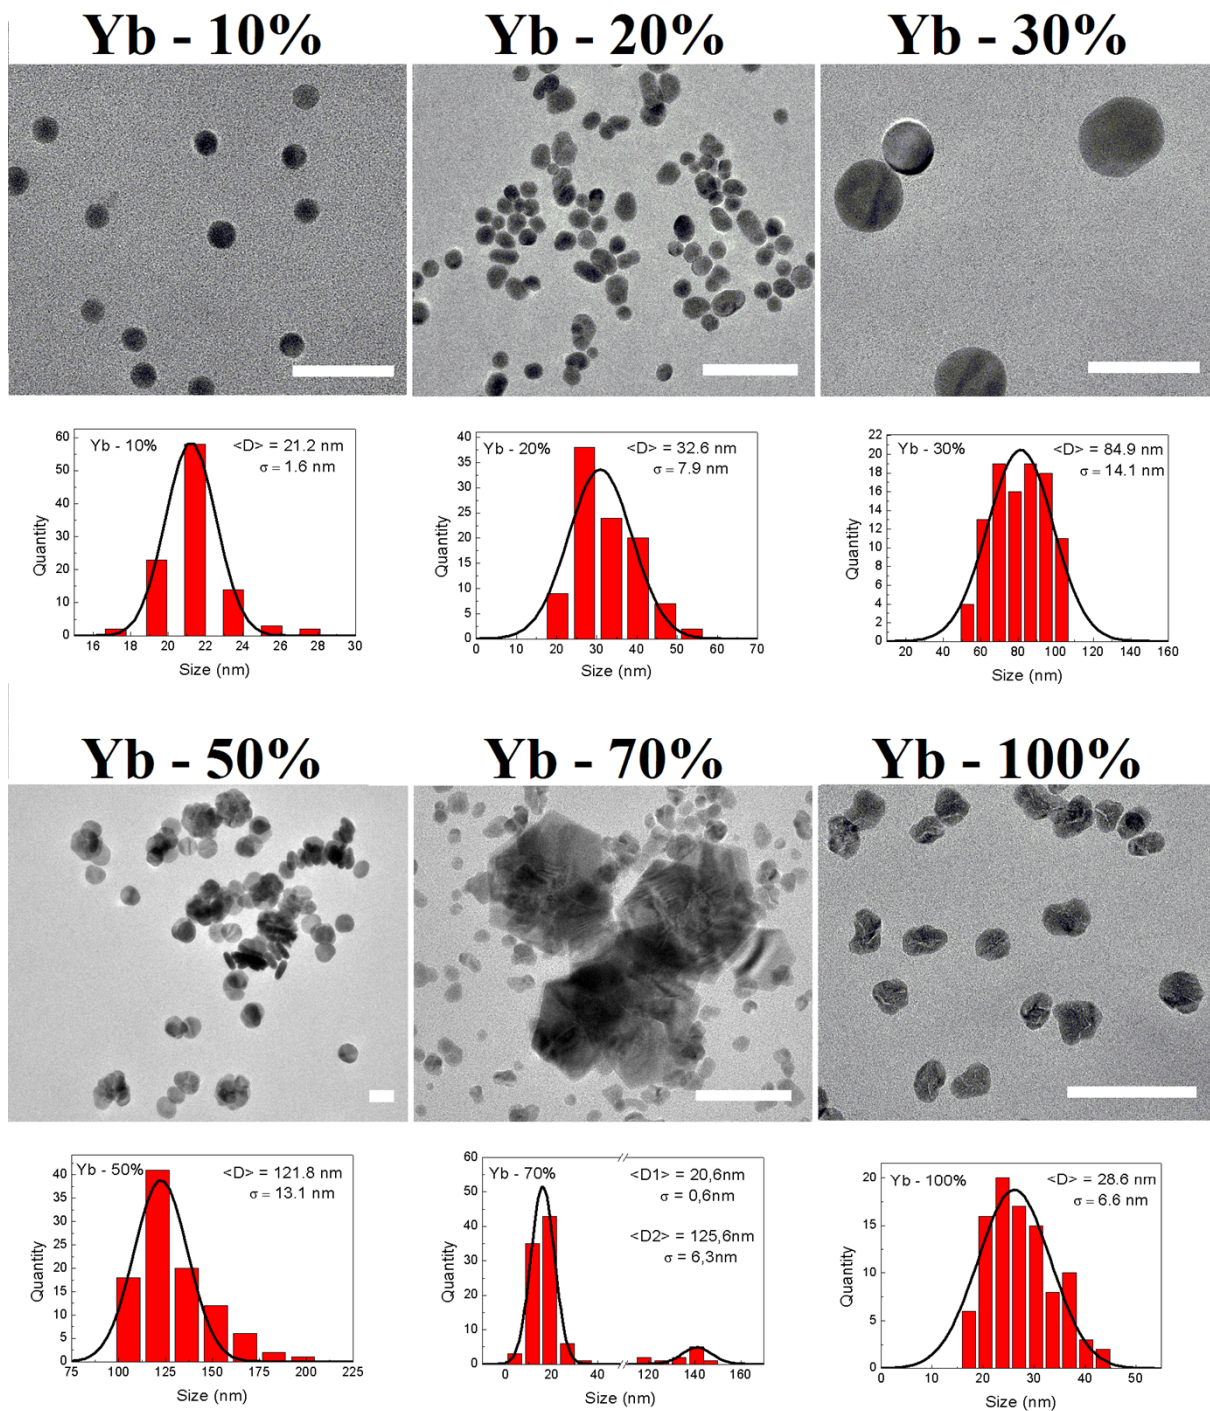

Figure 2S. TEM images and histograms of RENCs with different  $\text{Yb}^{3+}$  concentrations ( $\text{Er}^{3+} = 5\%$ ) – scale bare = 100 nm

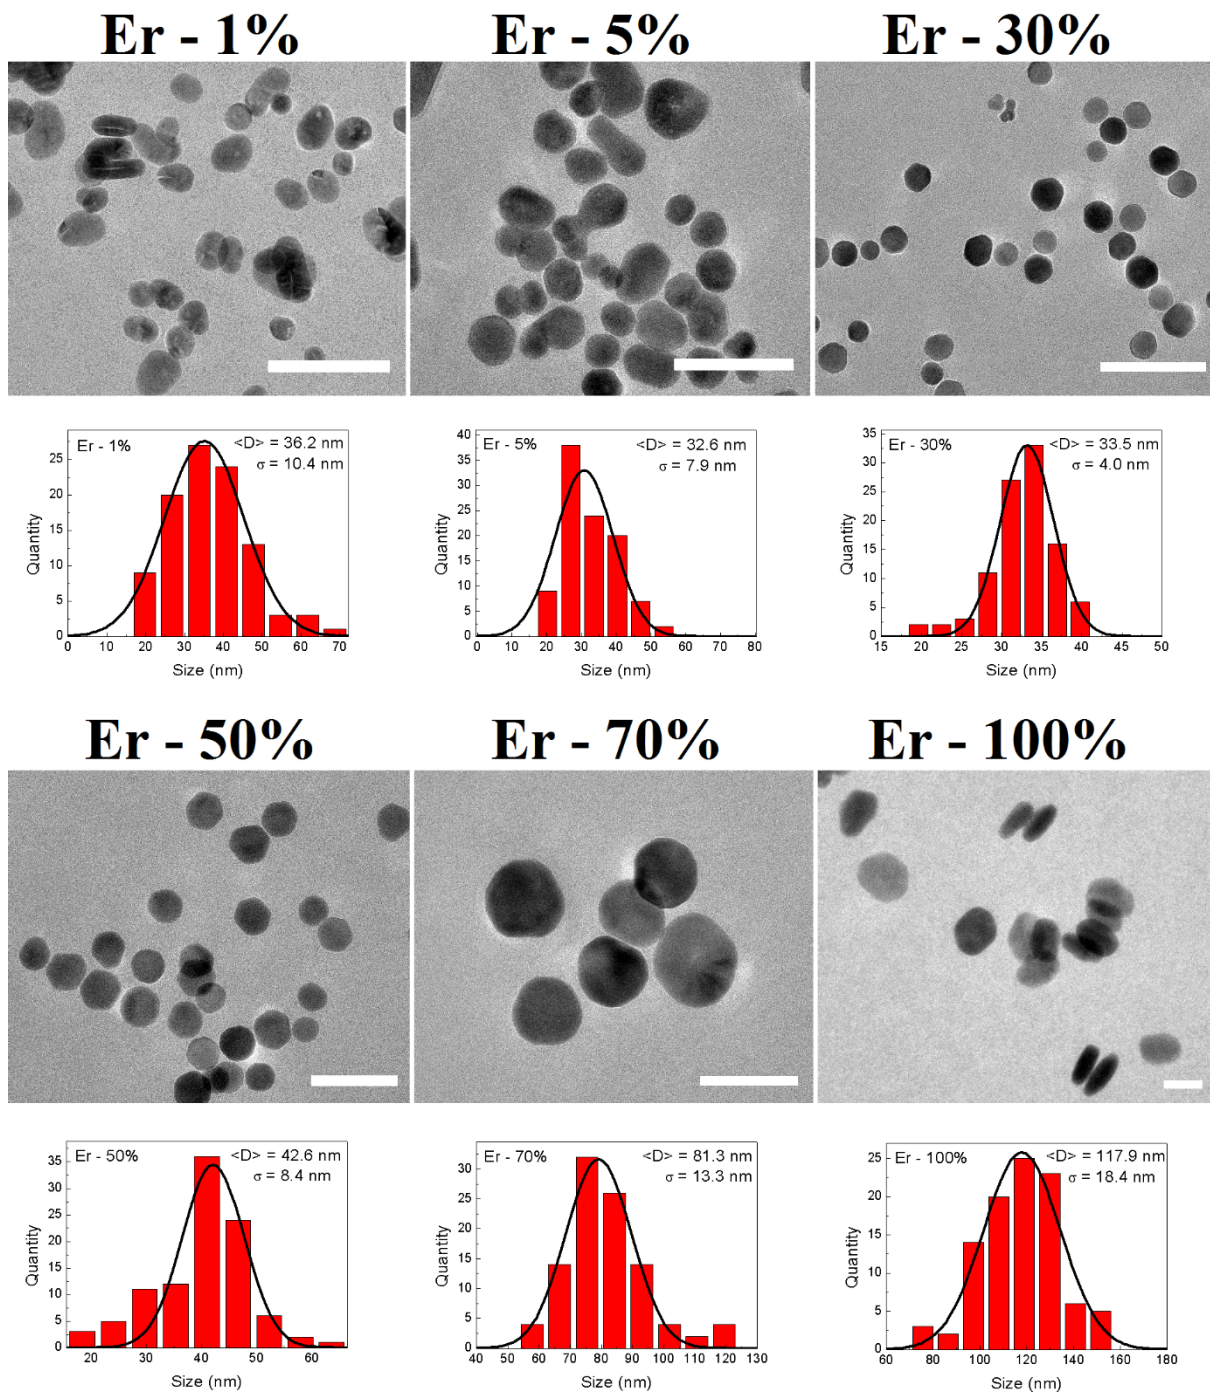

Figure 3S. TEM images and histograms of RENCs with different Er<sup>3+</sup> concentrations (Yb<sup>3+</sup> = 20%) – scale bar = 100 nm

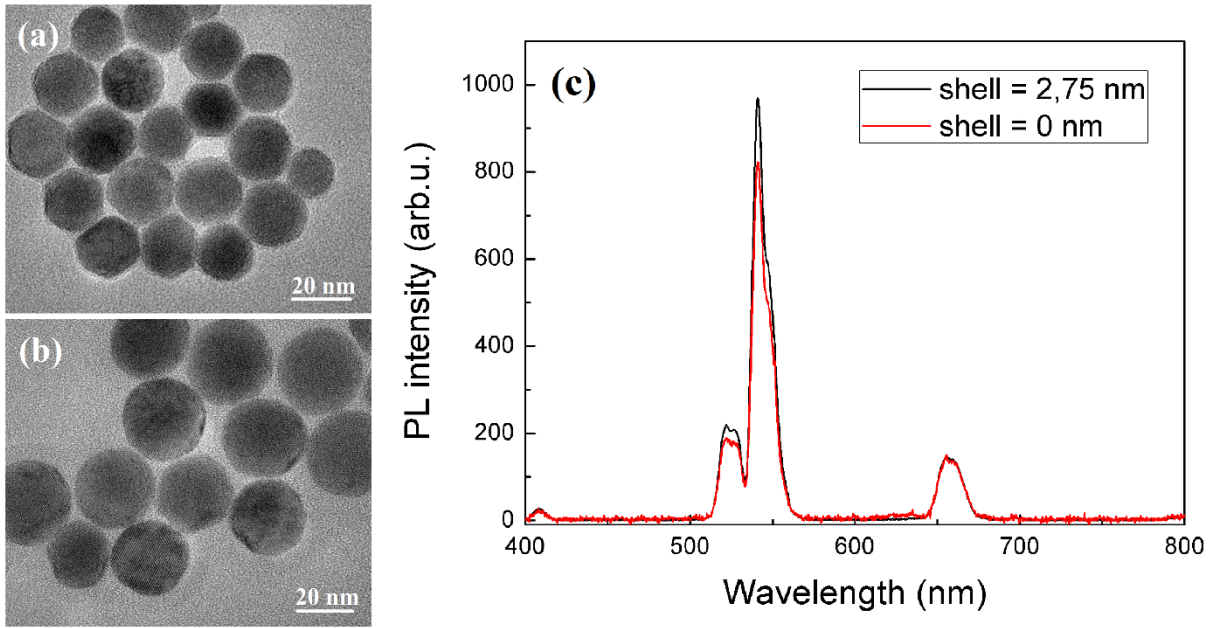

Figure 4S. TEM images of  $\text{NaGdF}_4:\text{Yb}^{3+},\text{Er}^{3+}$  core RENCs (a),  $\text{NaGdF}_4:\text{Yb}^{3+},\text{Er}^{3+}/\text{NaGdF}_4$  core-shell RENCs and PL emission from both kinds of RENCs
